# Supplementary material for: Carbon nanofiber-templated mesoporous TiO2 nanotubes as a high-capacity anode material for lithium-ion batteries
Source: Royal Society of Chemistry journal article supplement (doi:10.1039/c3ra47239f), 2014-01-01
Supplement: c3ra47239f.pdf [file c3ra47239f.pdf]

## Electronic Supplementary Information

# Carbon nanofibers-templated mesoporous TiO<sub>2</sub> nanotubes as a high-capacity anode material for lithium-ion batteries

Zhicai Xing,<sup>a</sup> Abdullah M. Asiri,<sup>b,c</sup> Abdullah Y. Obaid,<sup>b,c</sup> Xuping Sun<sup>\*a,b,c</sup> and Xin Ge<sup>\*d</sup>

<sup>a</sup> State Key Laboratory of Electroanalytical Chemistry, Changchun Institute of Applied Chemistry, Changchun 130022, Jilin, P. R. China

<sup>b</sup> Chemistry Department, Faculty of Science, King Abdulaziz University, Jeddah 21589, Saudi Arabia

<sup>c</sup> Center of Excellence for Advanced Materials Research, King Abdulaziz University, Jeddah 21589, Saudi Arabia

<sup>d</sup> State Key Laboratory of Rare Earth Resource Utilization, Changchun Institute of Applied Chemistry, Chinese Academy of Sciences, Changchun 130022, Jilin, China.

\*To whom correspondence should be addressed. Tel/Fax: +86-431-85262065. E-mail: sunxp@ciac.jl.cn; xge@ciac.ac.cn

## Experimental section

### Materials

Polyacrylonitrile (PAN) and N,N-dimethylformamide solution (DMF) were purchased from Aldrich Chemical Co. Tetrabutyl titanate (TBOT), ammonia water and the other

chemicals were purchased from Aladdin Ltd. (Shanghai, China) and used as received without further purification. The water used throughout all experiments was purified through a Millipore system.

### **Synthesis of carbon nanofibers**

In a typical synthesis process, PAN was used as a carbon precursor. The PAN was dissolved in DMF (10 wt%) at room temperature and stirred for 12 h. The clear solution was electrospun at 20 kV, and the fibers were collected on a aluminum foil. The resulting fibers were first annealed at 280 °C for 6 h in the air for stabilization, and then calcined at 800 °C for 1 h in N<sub>2</sub> ambient for obtaining the carbon nanofibers.

### **Synthesis of mesoporous TiO<sub>2</sub> nanotubes**

Carbon nanofibers (2.4 mg) were dispersed in absolute ethanol (23 mL) and mixed with ammonia solution (0.053 mL, 28 wt%) under ultrasound for 15 min. Afterward, TBOT (0.16 mL) was added dropwise in 2 min and allowed to proceed at 45 °C under magnetic stirring for 6 h. The resultant product was centrifuged and washed with deionized water and ethanol for 3 times, respectively, followed by drying at 100 °C and calcination at 550 °C for 4 h in air.<sup>1</sup>

### **Characterizations**

Scanning electron microscope (SEM) measurements were made on a XL30 ESEM FEG microscope. Transmission electron microscopy (TEM) measurements were made on a Hitachi H-8100 electron microscope (Hitachi, Tokyo, Japan). Powder X-ray diffraction (XRD) data were recorded on a RigakuD/MAX 2550 diffractometer.

The Brunauer–Emmett–Teller (BET) surface area and pore volume were measured on a Quantachrome NOVA 1000 system at liquid N<sub>2</sub> temperature.

### Electrochemical Measurements

The electrodes were prepared by mixing active materials (80 wt%), acetylene black (10 wt%), and polyvinylidene fluoride (PVDF, 10 wt%) in N-methyl-2-pyrrolidone (NMP). The above slurries were then uniformly spread onto a copper foil and dried at 120 °C in vacuum (active material: 1.2 mg). Coin cells (CR2025) were assembled using lithium metal as the counter electrode, Celgard 2400 membrane as the separator and LiPF<sub>6</sub> (1 M) in ethylene carbonate/dimethyl carbonate/ethylmethyl carbonate (EC/DMC/EMC, 1:1:1 vol%) as the electrolyte. The galvanostatic charge-discharge tests were carried out on a Land Battery Measurement System (Land, China). The weight of active materials is based on the weight of the mesoporous TiO<sub>2</sub> nanotubes. Electrochemical impedance spectroscopy (EIS) measurements were also carried out in the frequency range of 100 kHz–0.01 Hz (CHI 660D).

### Reference

1. W. Li, J. Yang, Z. Wu, J. Wang, B. Li, S. Feng, Y. Deng, F. Zhang, D. Zhao, *J. Am. Chem. Soc.*, 2012, **134**, 11864.

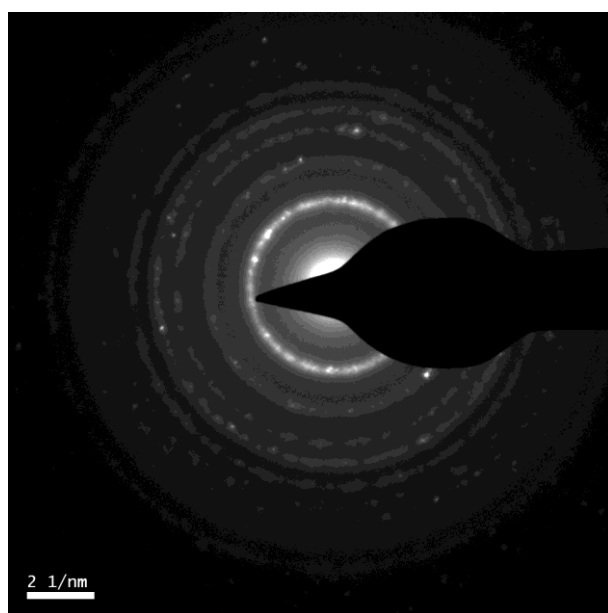

Fig. S1 The SAED pattern of the TiO<sub>2</sub> nanotubes.

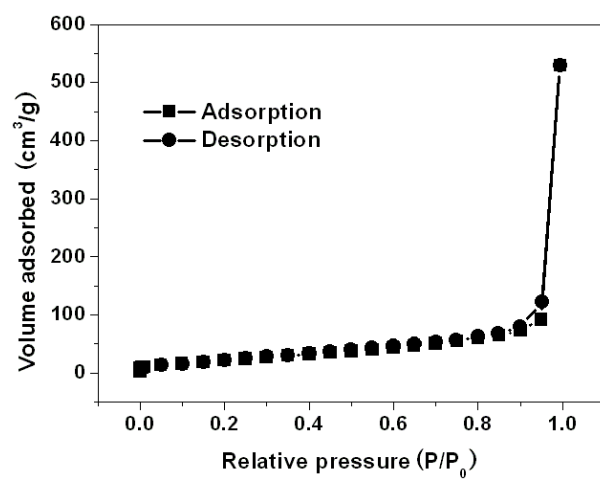

Fig. S2 N<sub>2</sub> adsorption–desorption isotherm of Degussa P-25 nanoparticles.

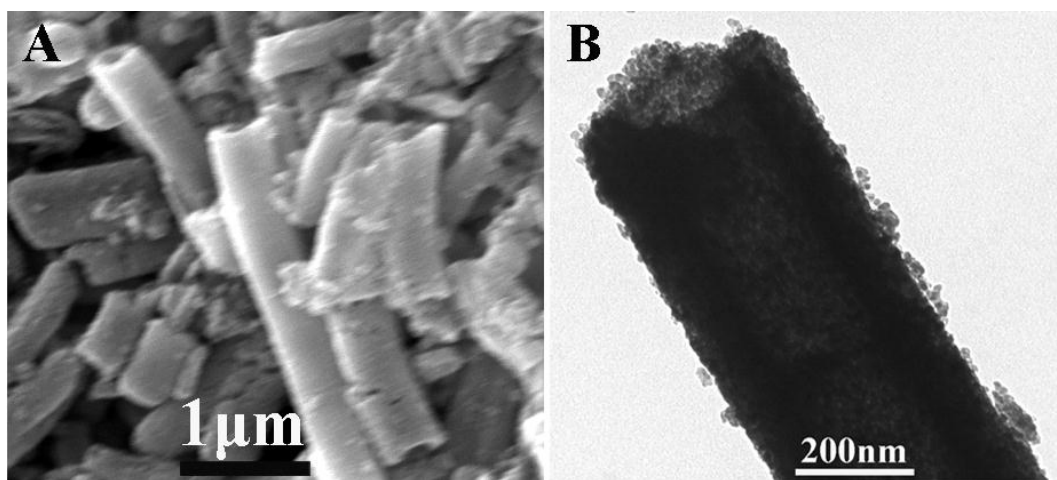

Fig. S3 The SEM and TEM images of TiO<sub>2</sub> nanotubes after cycling for 500 cycles.
